# Supplementary material for: IMM-BCP-01, a patient-derived anti-SARS-CoV-2 antibody cocktail, is active across variants of concern including Omicron BA.1 and BA.2
Source: PubMed Central journal article supplement (PMC9273042; doi:10.1126/sciimmunol.abl9943), 2022-06-30
Supplement: sciimmunol.abl9943_sm.pdf [file sciimmunol.abl9943_sm.pdf]

Supplementary Materials for

**IMM-BCP-01, a patient-derived anti-SARS-CoV-2 antibody cocktail, is active across variants of concern including Omicron BA.1 and BA.2**

Pavel A. Nikitin *et al.*

Corresponding author: Pavel A. Nikitin, [pnikitin@immunome.com](mailto:pnikitin@immunome.com)

DOI: [10.1126/sciimmunol.abl9943](https://doi.org/10.1126/sciimmunol.abl9943)

**The PDF file includes:**

Figs. S1 to S5  
Table S1

**Other Supplementary Material for this manuscript includes the following:**

Table S2

1 **Supplementary Materials information to IMM-BCP-01, a Patient-Derived Anti-SARS-CoV-**  
2 **2 Antibody Cocktail, Is Active Across Variants of Concern Including Omicron BA.1 and**  
3 **BA.2**

4  
5  
6 **Authors:** Pavel A. Nikitin<sup>1\*</sup>, Jillian M. DiMuzio<sup>1</sup>, John P. Dowling<sup>1</sup>, Nirja B. Patel<sup>1</sup>, Jamie L.  
7 Bingaman-Steele<sup>1</sup>, Baron C. Heimbach<sup>1</sup>, Noeleya Henriquez<sup>1</sup>, Chris Nicolescu<sup>1</sup>, Antonio Polley<sup>1</sup>,  
8 Eden L. Sikorski<sup>1</sup>, Raymond J. Howanski<sup>1</sup>, Mitchell Nath<sup>1</sup>, Halley Shukla<sup>1</sup>, Suzanne M.  
9 Scheaffer<sup>3</sup>, James P. Finn<sup>1</sup>, Li-Fang Liang<sup>1</sup>, Todd Smith<sup>1</sup>, Nadia Storm<sup>2</sup>, Lindsay G. A. McKay<sup>2</sup>,  
10 Rebecca I. Johnson<sup>2</sup>, Lauren E. Malsick<sup>2</sup>, Anna N. Honko<sup>2</sup>, Anthony Griffiths<sup>2</sup>, Michael S.  
11 Diamond<sup>3</sup>, Purnanand Sarma<sup>1</sup>, Dennis H. Geising<sup>1</sup>, Michael J. Morin<sup>1</sup>, and Matthew K. Robinson<sup>1</sup>

12  
13 **Affiliations:**

14 <sup>1</sup>**Immunome, Inc., Exton, PA, U.S.A.**

15 <sup>2</sup>Department of Microbiology, Boston University School of Medicine and National Emerging  
16 Infectious Diseases Laboratories, Boston, MA, USA

17 <sup>3</sup>Departments of Medicine, Molecular Microbiology, Pathology & Immunology, Washington  
18 University School of Medicine, St. Louis, MO 63110, USA

19  
20 **\*Corresponding author**

21 **Email: pnikitin@immunome.com**

22

23

24 **LIST OF SUPPLEMENTARY MATERIALS**

25 **Supplementary Table 1. Breadth of binding of IMM20190/184/253 antibodies to RBD**  
26 **proteins bearing mutations found in CDC VOCs.**

27 **Supplementary Table 2. Raw data.**

28 **Supplementary Figure 1. Binding patterns of IMM20184, IMM20190 and IMM20253 Fabs**  
29 **to Spike protein.**

30 **Supplementary Figure 2. Antibody exposure and pharmacokinetics in dosed hamsters.**

31 **Supplementary Figure 3. Three selected antibodies have a synergistic neutralizing effect.**

32 **Supplementary Figure 4. Focus reduction neutralization assay (FRNT) of SARS-CoV-2**  
33 **variants in the presence of IMM20184, IMM20253 and IMM20253/184 combination.**

34 **Supplementary Figure 5. Binding of IMM antibodies to soluble RBD proteins from SARS-**  
35 **CoV-1 and SARS-CoV-2 variants in a steady-state hTRF assay.**

36

37

38

39

40

41

42

43

44 **Supplementary Tables**

45

46 **Supplementary Table 1. Breadth of binding of IMM20190/184/253 antibodies to RBD**  
 47 **proteins bearing mutations found in CDC VOCs. EC50 (pM) relative to respective reference**  
 48 **proteins measured using hTRF assay.**

| Sort | His-tagged protein                                                                                      | Binding Region | Region of Origin                    | Variant          | Lineage               | IMM20190     | IMM20253    | IMM20184     |
|------|---------------------------------------------------------------------------------------------------------|----------------|-------------------------------------|------------------|-----------------------|--------------|-------------|--------------|
| 1    | A352S                                                                                                   | RBD            |                                     |                  |                       | 25.4         | 33.0        | 27.7         |
| 2    | A475V                                                                                                   | RBD            |                                     |                  |                       | 70.2         | 34.6        | 30.3         |
| 3    | E406Q                                                                                                   | RBD            |                                     |                  |                       | 67.2         | 44.1        | 29.2         |
| 4    | E484K                                                                                                   | RBD            | South Africa; Brazil                | beta; gamma      | B.1.351; P.1          | 39.2         | 32.7        | 23.2         |
| 5    | E484Q                                                                                                   | RBD            | India                               |                  | B.1.617               | 59.9         | 22.7        | 21.0         |
| 6    | F486S                                                                                                   | RBD            |                                     | lambda           | C.37                  | 41.2         | 26.3        | 23.0         |
| 7    | F490S                                                                                                   | RBD            | Peru                                | lambda           | C.37                  | 14.7         | 73.4        | 60.8         |
| 8    | G339D, S371L, S373P, S375F, K417N, N440K, G446S, S477N, T478K, E484A, Q493R, G496S, Q498R, N501Y, Y505H | RBD            | South Africa                        | omicron          | B.1.1.529             | not detected | 48.5        | not detected |
| 9    | K417N                                                                                                   | RBD            | South Africa                        | beta             | B.1.351               | >500         | 67.4        | 44.3         |
| 10   | K417N, E484K, N501Y                                                                                     | RBD            | South Africa                        | beta             | B.1.351               | not detected | 25.0        | 20.7         |
| 11   | K417T, E484K, N501Y                                                                                     | RBD            | Brazil                              | gamma            | P.1                   | >500         | 22.6        | 17.9         |
| 12   | K444R                                                                                                   | RBD            |                                     |                  |                       | 33.9         | 26.7        | 20.9         |
| 13   | L452R                                                                                                   | RBD            | USA; India                          | epsilon; delta   | B.1.427; B.1.617      | 40.9         | 34.3        | 41.2         |
| 14   | L452R, T478K                                                                                            | RBD            | India                               | delta            | B.1.617.2             | 52.8         | 61.7        | 111          |
| 15   | N439K                                                                                                   | RBD            | Scotland; Europe                    |                  |                       | 76.6         | 56.5        | 52.1         |
| 16   | N440K                                                                                                   | RBD            |                                     |                  |                       | 45.6         | 39.7        | 32.1         |
| 17   | N501Y                                                                                                   | RBD            | UK; South Africa; Brazil            | alpha; beta;     | B.1.1.7; B.1.351; P.1 | 311          | 59.0        | 42.2         |
| 18   | <b>Spike RBD (319-591)</b>                                                                              | <b>RBD</b>     | <b>Wuhan / Washington reference</b> | <b>reference</b> |                       | <b>69.9</b>  | <b>53.4</b> | <b>46.2</b>  |
| 19   | T478I                                                                                                   | RBD            |                                     |                  |                       | 16.4         | 45.5        | 68.5         |
| 20   | Y453F                                                                                                   | RBD            | Denmark                             | mink             |                       | 71.6         | 65.6        | 50.1         |
| 21   | A222S, D614G                                                                                            | S1             | Europe; Spain                       |                  |                       | 51.0         | 45.1        | 29.9         |
| 22   | D614G                                                                                                   | S1             | Multiple                            |                  |                       | 69.9         | 62.9        | 44.1         |
| 23   | K417N, E484K, N501Y, D614G                                                                              | S1             | South Africa                        | beta             | B.1.351               | 391          | 34.7        | 25.6         |
| 24   | <b>Spike S1 (WT)</b>                                                                                    | <b>S1</b>      | <b>Wuhan / Washington reference</b> | <b>reference</b> |                       | <b>58.8</b>  | <b>50.0</b> | <b>34.4</b>  |
| 25   | SARS-CoV-1                                                                                              | S1             | CoV-1 reference                     | wild type        |                       | not detected | 137.0       | >500         |
| 26   | T19R, G142D, E156G, Δ157-158, L452R, T478K, D614G, P681R                                                | S1             | India                               | delta            | B.1.617.2             | 22.2         | 40.9        | 30.6         |
| 27   | E154K, L452R, E484Q, D614G, P681R                                                                       | S1             | India                               |                  | B.1.617               | 38.2         | 49.2        | 22.7         |
| 28   | ΔHV69/70, 501Y, D614G                                                                                   | S1             | UK                                  | alpha            | B.1.1.7               |              |             |              |
| 29   | ΔHV69/70, Y453F, D614G                                                                                  | S1             | Denmark                             | mink             |                       | 48.1         | 67.1        | 34.8         |
| 30   | ΔHV69/70, ΔY144, N501Y, A570D, D614G, P681H                                                             | S1             | UK                                  | alpha            | B.1.1.7               | >500         | 63.1        | 49.1         |

49

50

51

52

53 **Supplementary Figures**

**A**

**Data in Support of Figure 1A: IMM20184 Fab Binding to Trimer**

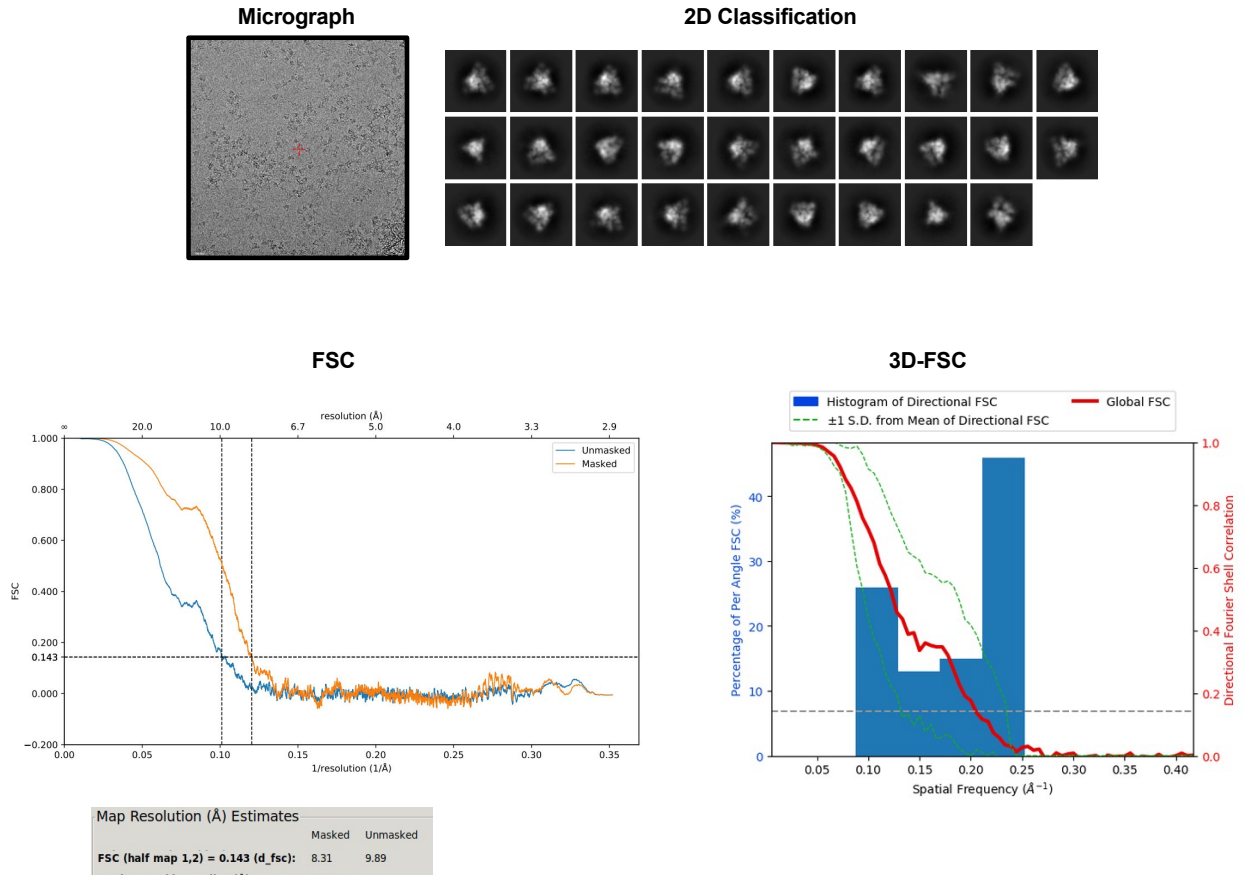

54

55

B

### Data in Support of Figure 1A: IMM20190 Fab Binding to Trimer

Micrograph

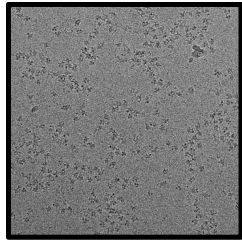

2D Classification

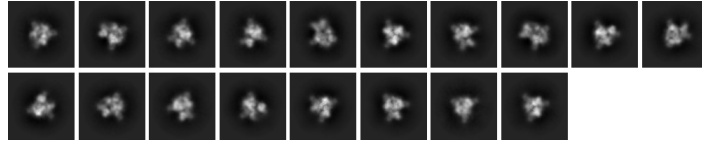

FSC

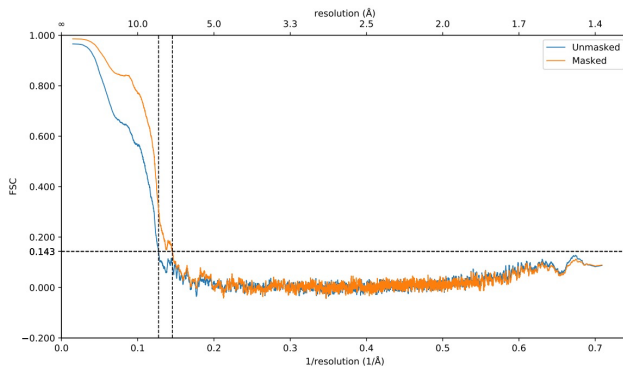

3D-FSC

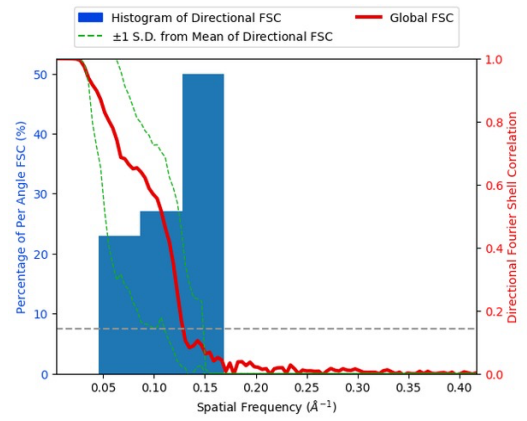

| Map Resolution (Å) Estimates               |        |          |
|--------------------------------------------|--------|----------|
|                                            | Masked | Unmasked |
| <b>FSC (half map 1,2) = 0.143 (d_fsc):</b> | 6.87   | 7.85     |

56

### C Data in Support of Figure 1A: IMM20253 Fab Binding to Trimer

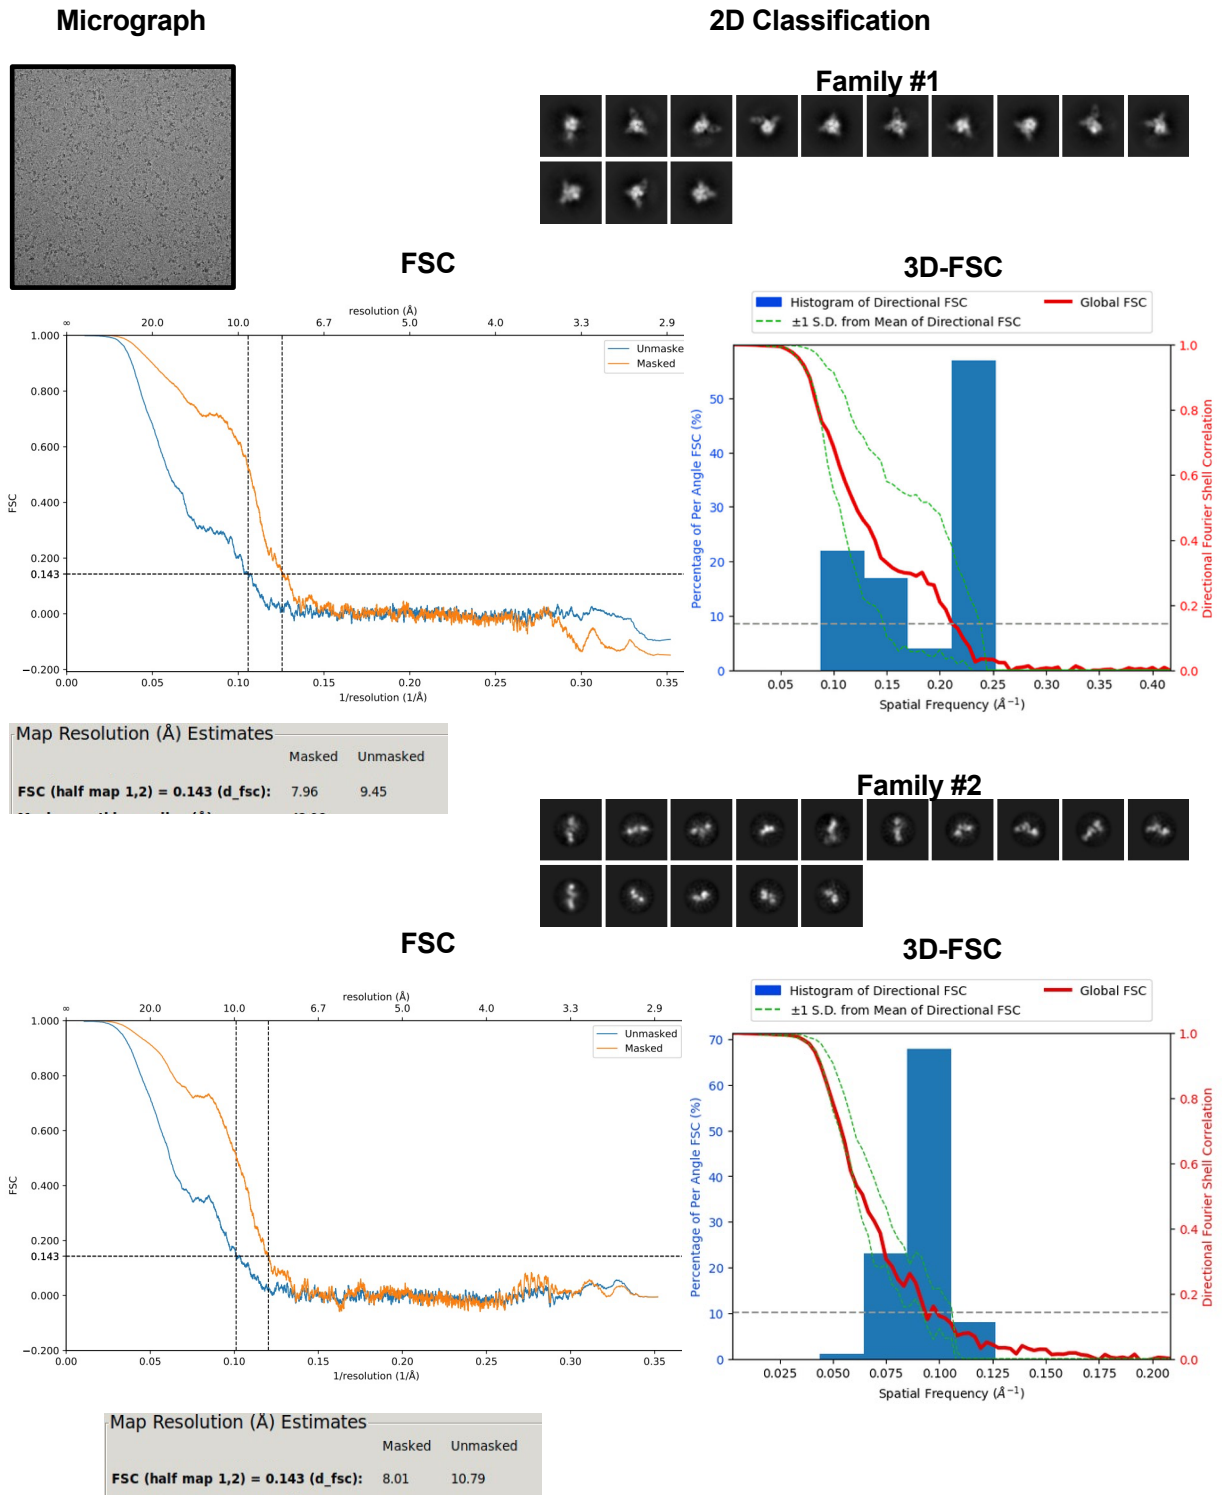

D

No Fab  
(Closed Trimer)

IMM20184

IMM20190

IMM20253

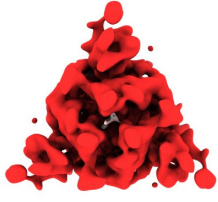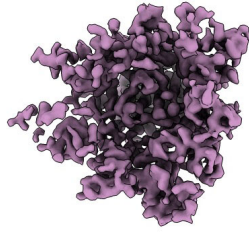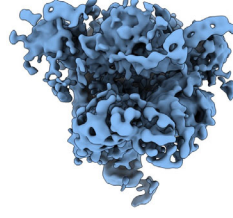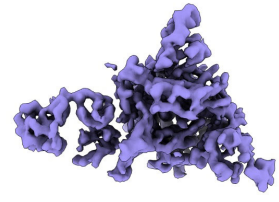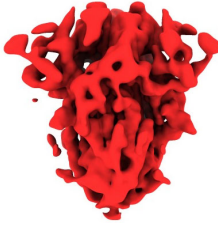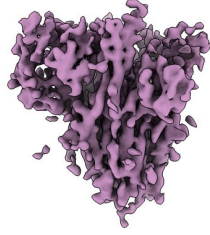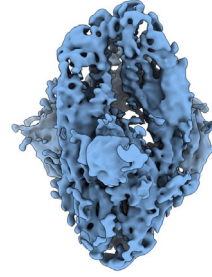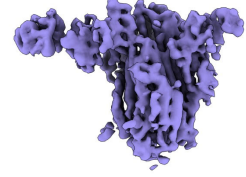

58

E

IMM20184

IMM20190

IMM20253

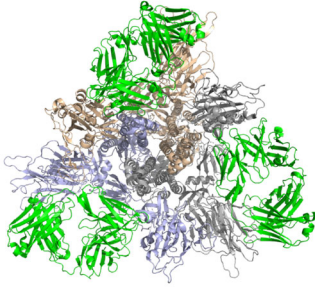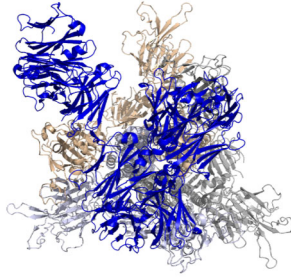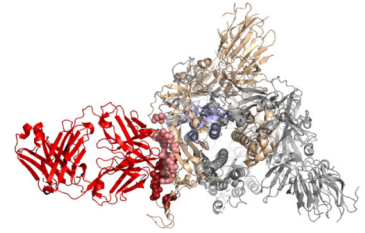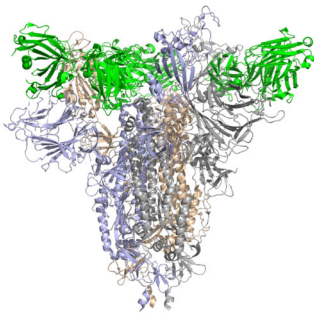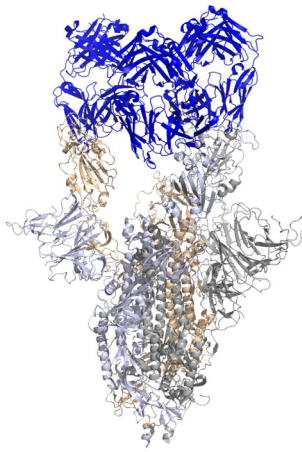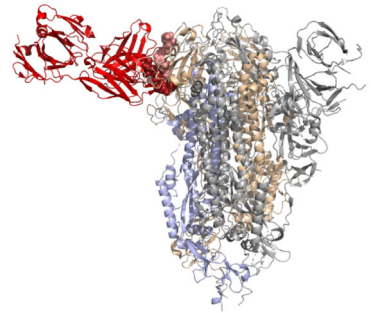

59



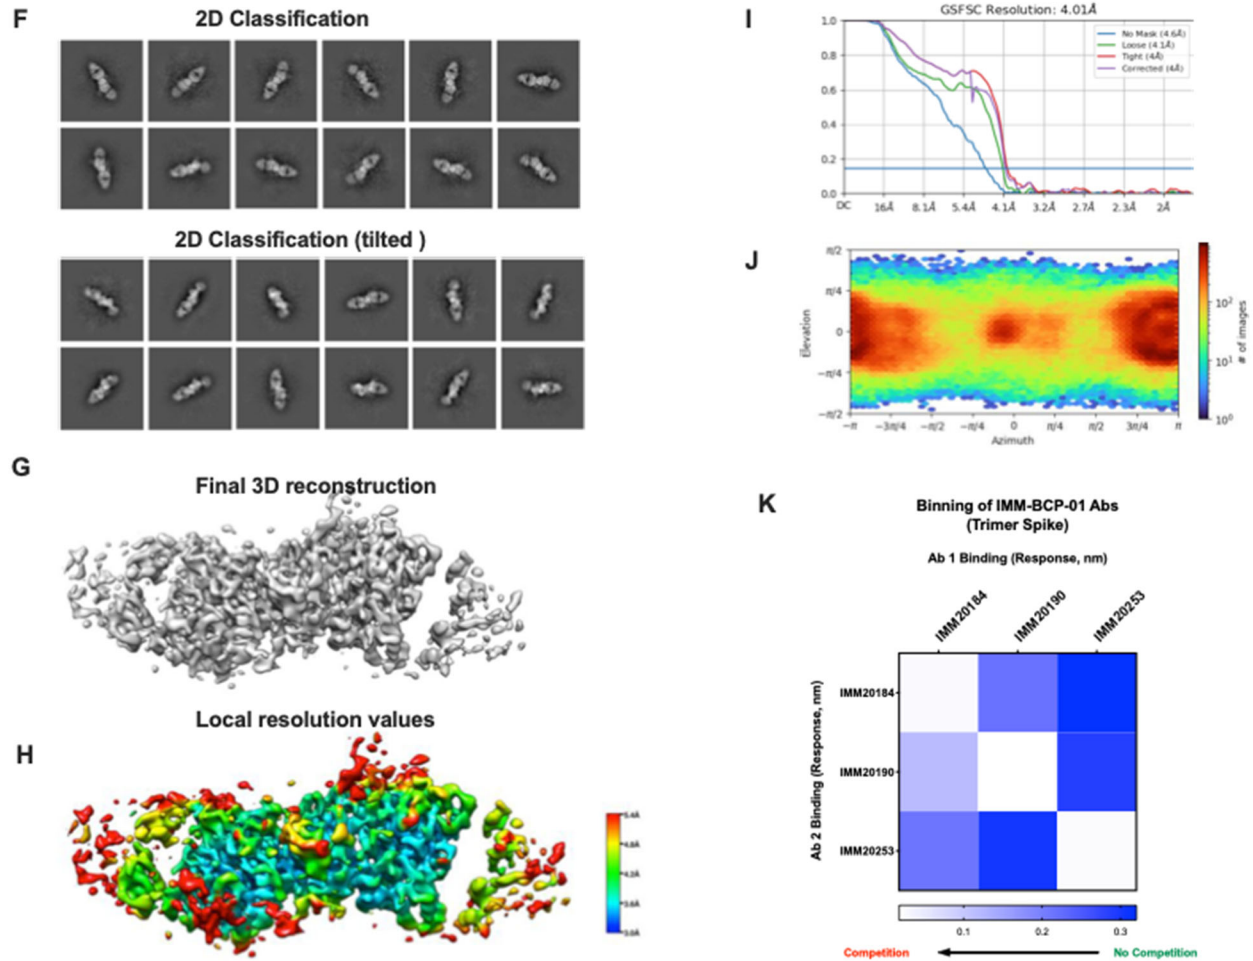

60

61 **Supplementary Figure 1. Binding pattern of IMM20184, IMM20190 and IMM20253 Fabs to**  
 62 **Spike protein.** (A) Cryo-EM micrographs, 2D classification and Fourier shell correlation (FSC)  
 63 and 3D-FSC graphs of Trimer-IMM20184 Fab complex. (B) Cryo-EM micrographs, 2D  
 64 classification and Fourier shell correlation (FSC) and 3D-FSC graphs of Trimer-IMM20190 Fab  
 65 complex. (C) Cryo-EM micrographs, 2D classification and Fourier shell correlation (FSC) and  
 66 3D-FSC graphs of Trimer-IMM20253 Fab complex. IMM20253 Fab binding to Trimer generates  
 67 two families (shown as Family#1 and 2). (D). Comparison of 3D reconstruction data (density only)  
 68 for a closed Trimer conformation, IMM20184 Fab-Trimer, IMM20190 Fab-Trimer and  
 69 IMM20253 Fab-Trimer complexes in support of data shown in Figure 1A. (E) Models PDB:7E8C,

70 PDB:6XLU, PDB:6XM5 or PDB:7NOH for Trimer and PDB:6TCQ for the Fabs demonstrate  
71 binding patterns and attack angles for IMM20184/190/253 antibodies. (F) CryoEM micrographs  
72 and 2D classification of a IMM20184 Fab – RBD – IMM20253 Fab complex for untilted (Top)  
73 and tilted (Bottom) datasets. Simultaneous binding of both Fabs is clearly visible. (G). Final 3D  
74 reconstruction of data shown in Supp. Figure 1F. Figure is generated in Chimera. (H) Final 4.0 Å  
75 map of S-RBD complexed with IMM20253 Fab and IMM20184 colored by the local resolution  
76 values as calculated by cryoSPARC 3.3. Figure generated with Chimera. (I) Fourier shell  
77 correlation (FSC) curves of the final 3D refinement of data from panel G and H in cryoSPARC  
78 3.3 for different types of masks. (J). Viewing directional distribution for the final refinement run  
79 for the complex shown in panels G and G, generated by cryoSPARC 3.3. The viewing direction  
80 distribution histogram shows the number of images with a particular viewing direction at each  
81 (elevation, azimuth angle). (K). Antibody binning on Octet Qke. IMM20184, IMM20190 and  
82 IMM20253 do not compete for soluble Trimer and RBD protein binding. Heat map values  
83 represent binding of the first antibody to Trimer (top), followed by binding of the second antibody  
84 (left), measured as Response parameter in nm.

85

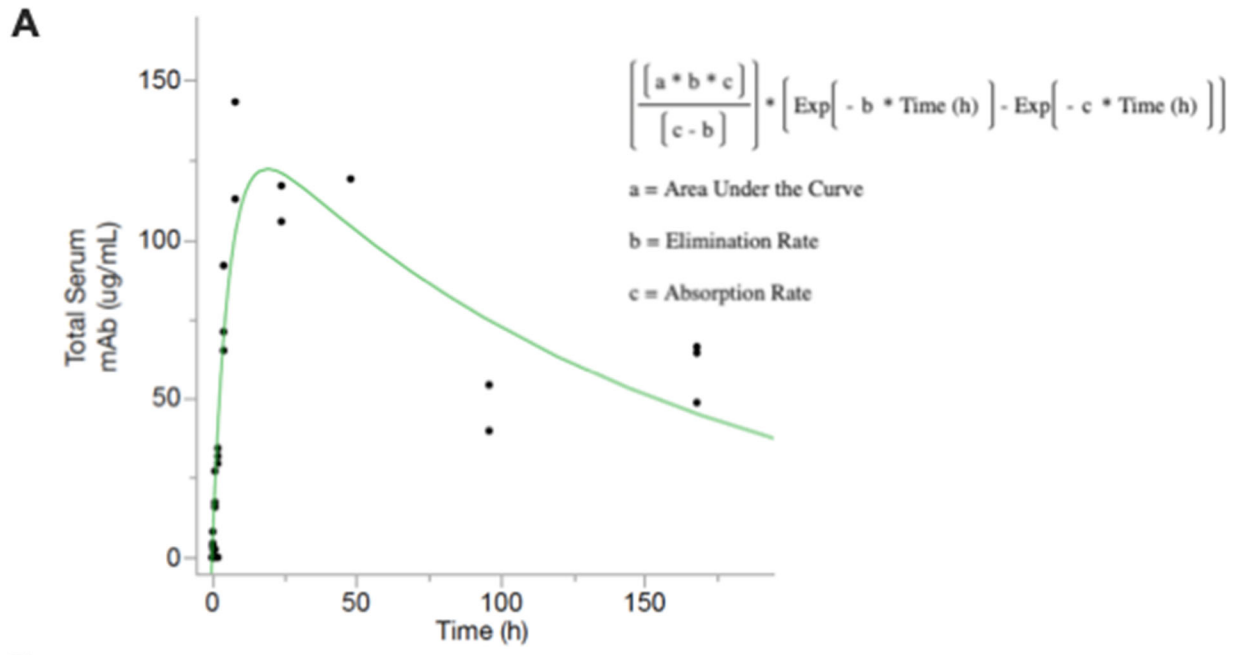

**B**

|           | Total mAb Dose (mg/Kg) | C <sub>max</sub> (ng/mL) | C <sub>96hr</sub> (ng/mL) | Absorption Rate (hr <sup>-1</sup> ) | Elimination Rate (hr <sup>-1</sup> ) | Half-life (hr) | AUC <sub>0-96hr</sub> (µg × hr/mL) | AUC <sub>inf</sub> (µg × hr/mL) |
|-----------|------------------------|--------------------------|---------------------------|-------------------------------------|--------------------------------------|----------------|------------------------------------|---------------------------------|
| Observed  | 9                      | 120.5                    | 74.4                      | 0.174                               | 0.007                                | 99.6           | 9259                               | 20195                           |
| Estimated | 6                      | 80.3                     | 49.6                      | 0.174                               | 0.007                                | 99.6           | 6173                               | 13463                           |
| Estimated | 3                      | 40.2                     | 24.8                      | 0.174                               | 0.007                                | 99.6           | 3086                               | 6732                            |

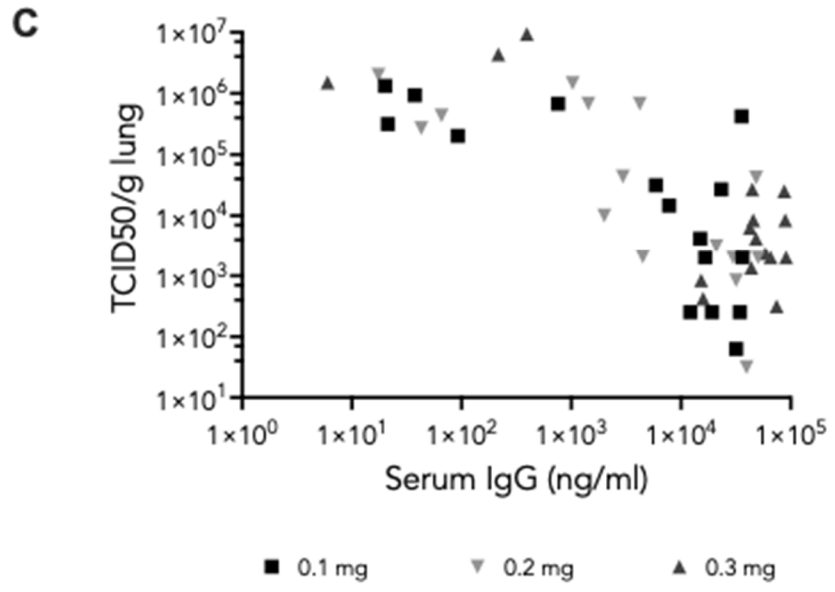

87 **Supplementary Figure 2. Antibody exposure and pharmacokinetics in dosed hamsters.** (A)  
88 Pharmacokinetics of the 3-Ab cocktail in hamsters. The 3-Ab cocktail (0.3 mg each) was  
89 administered i.p. into Syrian Golden hamsters and terminal bleeds (n = 4 per time point) were  
90 taken at 0.25, 0.5, 1, 2, 4, 8, 24, 48, 96, and 168 hours post administration. Total human IgG levels  
91 were determined by anti-human ELISA. Pharmacokinetics in animals exhibiting < 1000 ng/mL  
92 IgG in serum at timepoints >30 minutes post-injection. Green line is the calculated curve using the  
93 formula shown on the right. (B) PK parameters of data from panel A. (C) Viral titer in lungs of  
94 infected hamsters depends upon Ab exposure. Syrian golden hamsters challenged with  $3.3 \times 10^5$   
95 TCID50 viral inoculation of a non-adapted WA\_CDC-WA1/2020 SARS-CoV-2 isolate were  
96 treated with 3-Ab cocktail (IMM20184/IMM20190/IMM20253), at various dose levels, six hours  
97 post inoculation with virus. Lungs were harvested at day 4 post-treatment and viral titers were  
98 determined by TCID50 assay. Terminal levels of IgG in blood were quantified by anti-human  
99 ELISA.

100

A

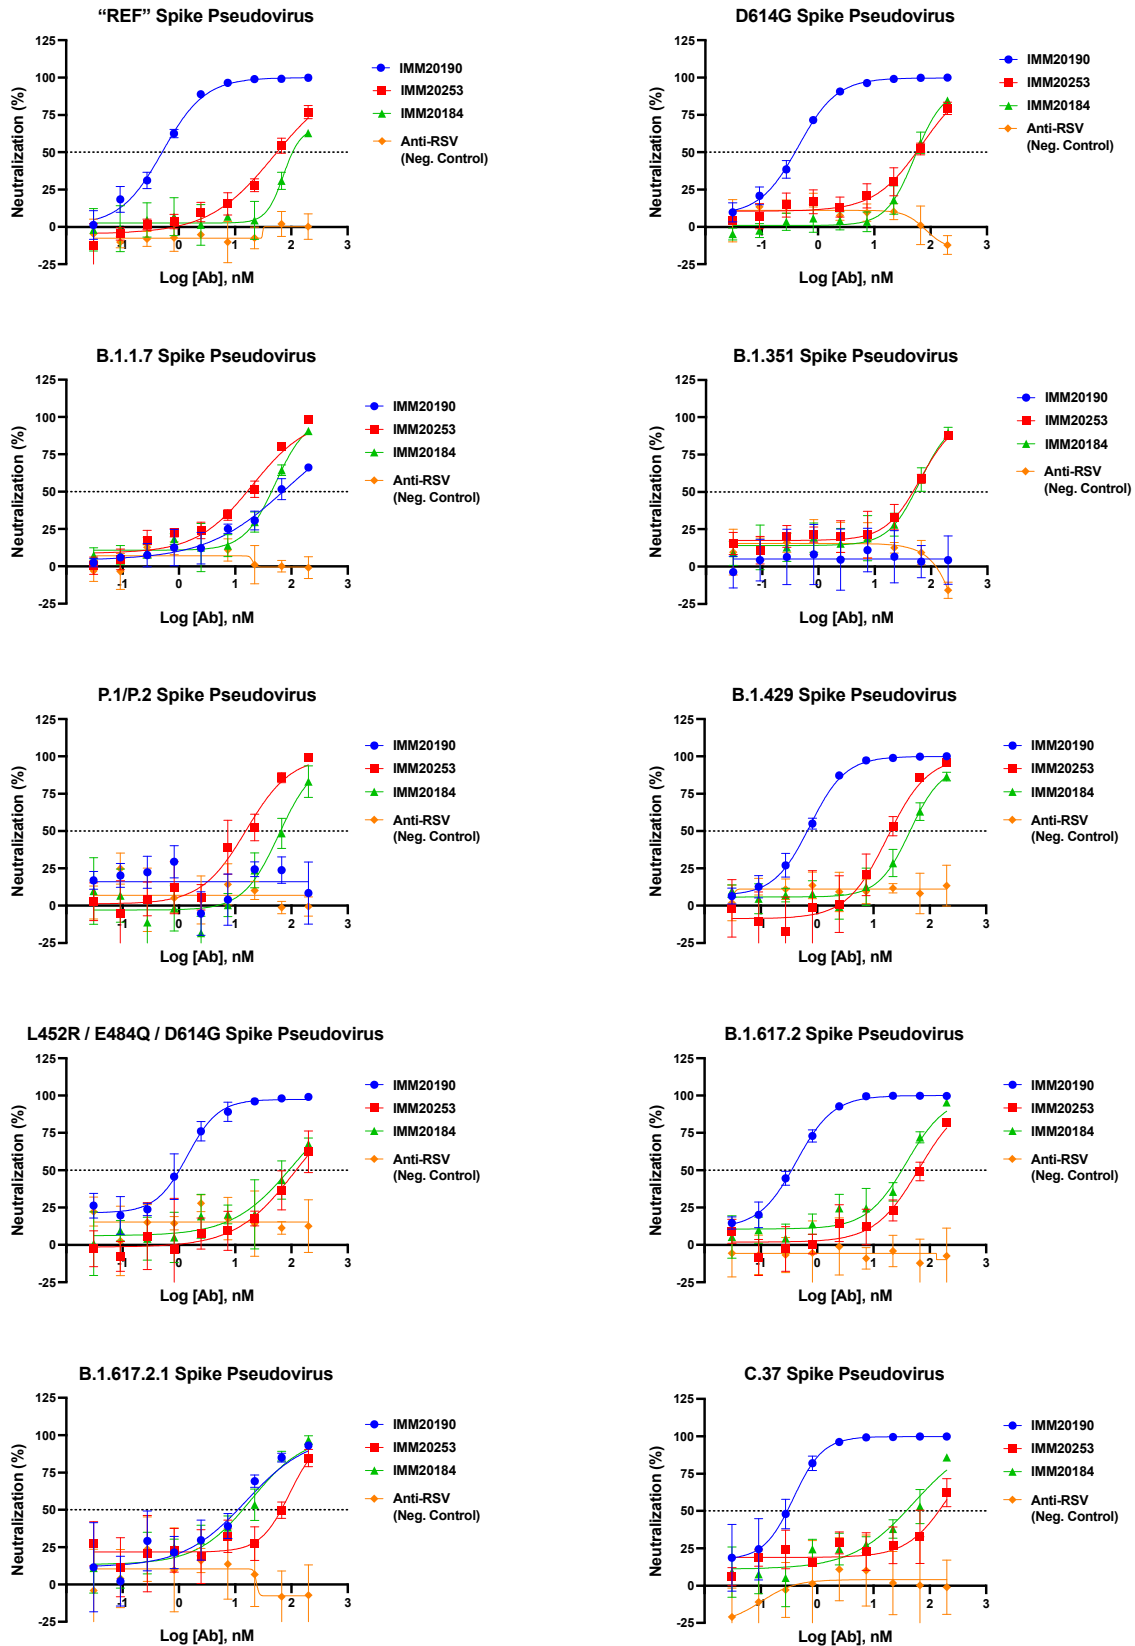

B

### Combination of IMM20190 with:

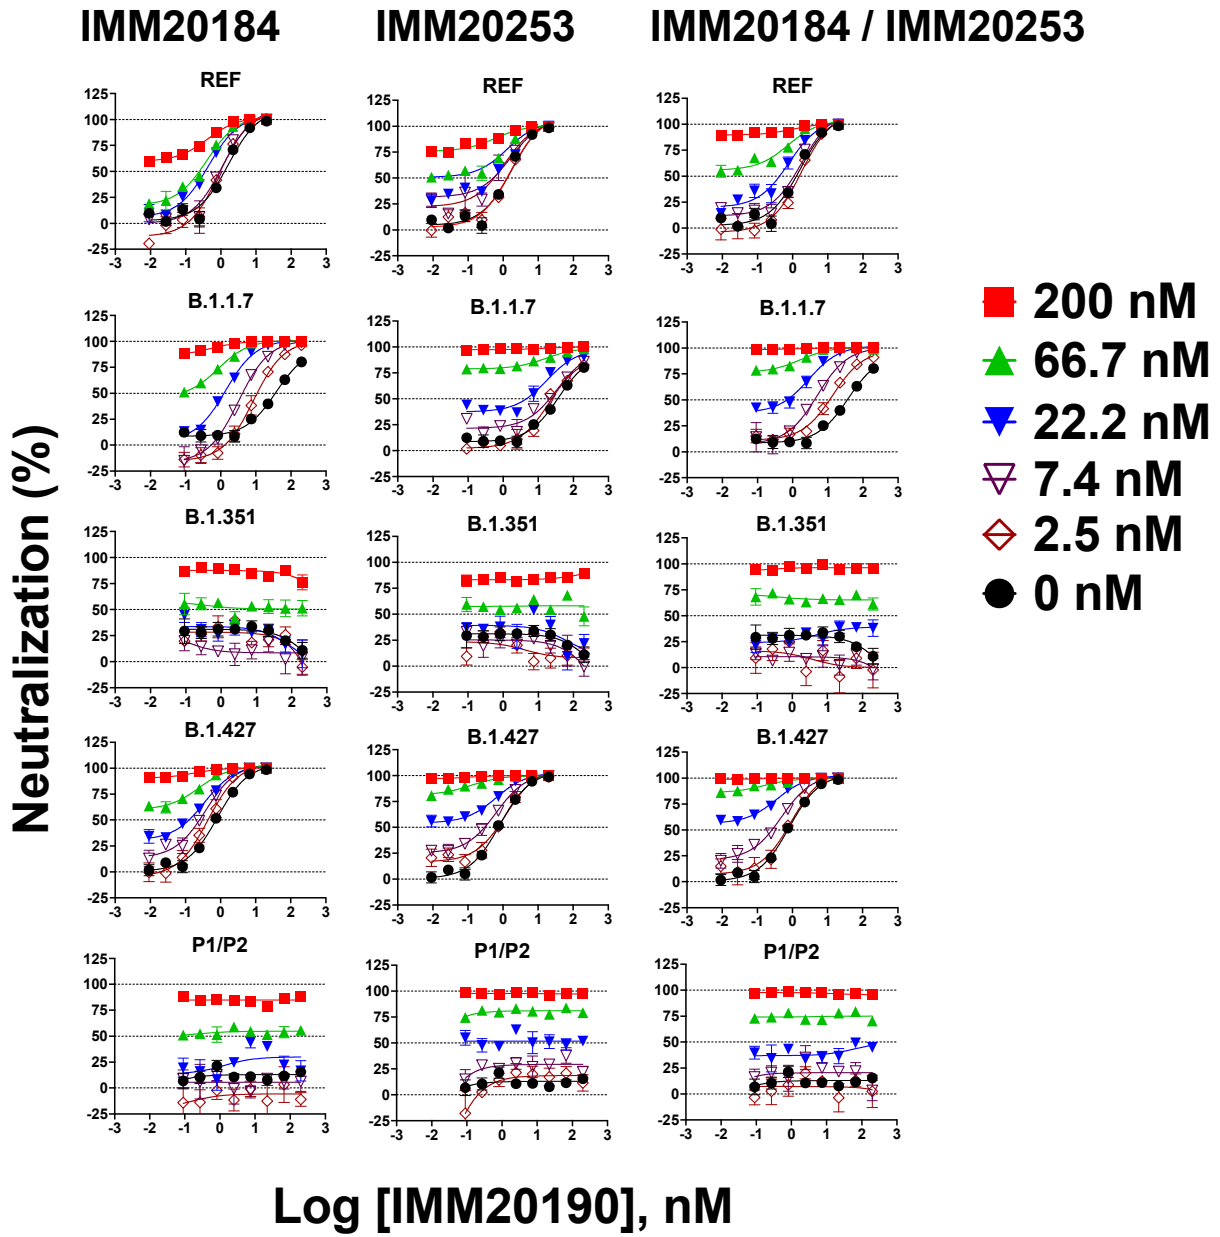

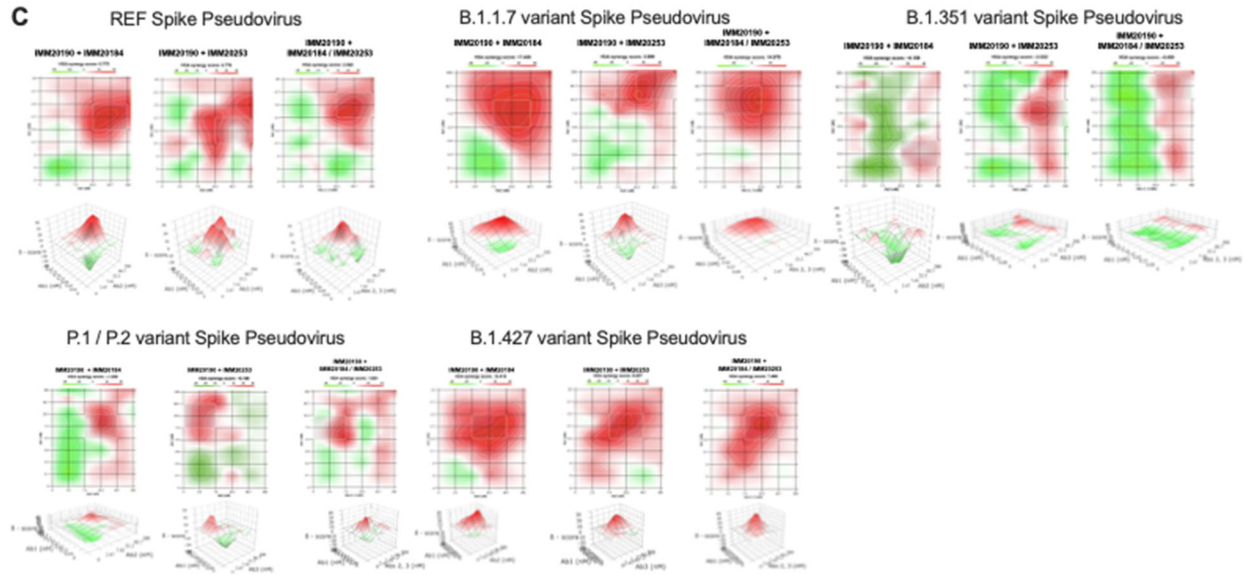

**D**

| Variant              | IMM20190 + IMM20184 | IMM20190 + IMM20253 | IMM20190 + IMM20184 / IMM20253 | IMM20184 + IMM20253 |
|----------------------|---------------------|---------------------|--------------------------------|---------------------|
| Spike REF            | 5.8                 | 4.8                 | 2.1                            |                     |
| UK (B.1.1.7)         | 17.4                | 3.9                 | 15.0                           |                     |
| SA (B.1.351)         | -4.1                | -3.0                | -8.4                           | 2.53                |
| Brazilian (P.1/P.2)  | -1.23               | -0.19               | 1.82                           | -3.35               |
| California (B.1.429) | 10.4                | 6.2                 | 7.5                            |                     |

103

104 **Supplementary Figure 3. Three selected antibodies have a synergistic neutralizing effect.**

105 (A) Neutralization properties of standalone IMM20190, IMM20184 and IMM20253 antibodies  
 106 against 10 different Spike variant pseudoviruses. (B) REF, B.1.1.7 (alpha), B.1.351 (beta), P1  
 107 (gamma), and B.1.427 (epsilon) pseudovirus variant neutralization by IMM20190 combination  
 108 with either IMM20184, IMM20253 or both. (C) The Highest Single Agent (HSA) scores for 2-  
 109 Ab and 3-Ab combinations. IMM20190 was mixed with IMM20184 and IMM20253 at 1:0.5:0.5  
 110 ratio. (D) HSA scores for two and three antibody cocktail.

111

# Focus Reduction Neutralization Assay (FRNT)

A

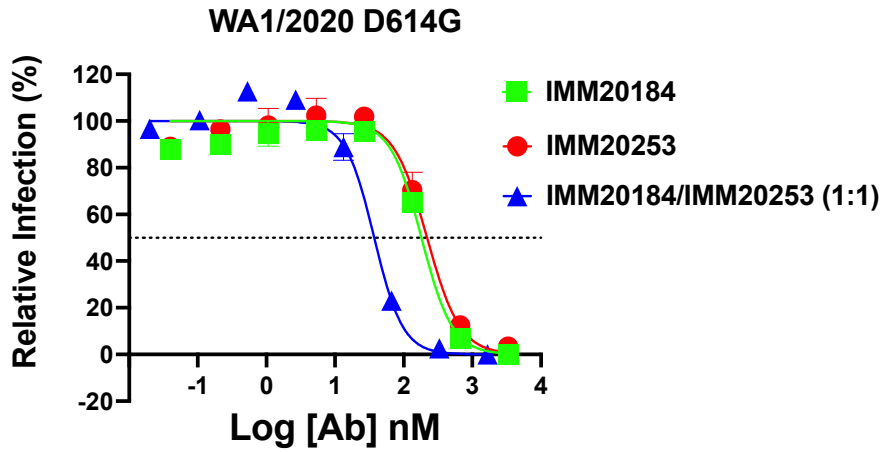

B

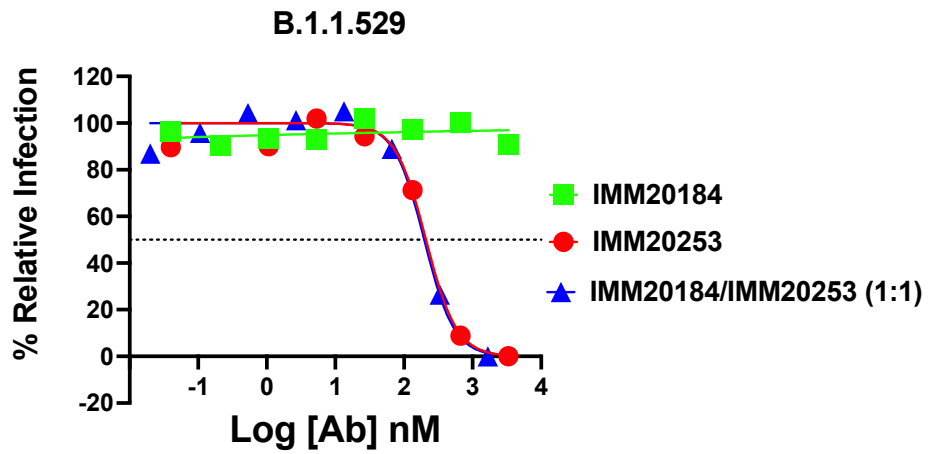

C

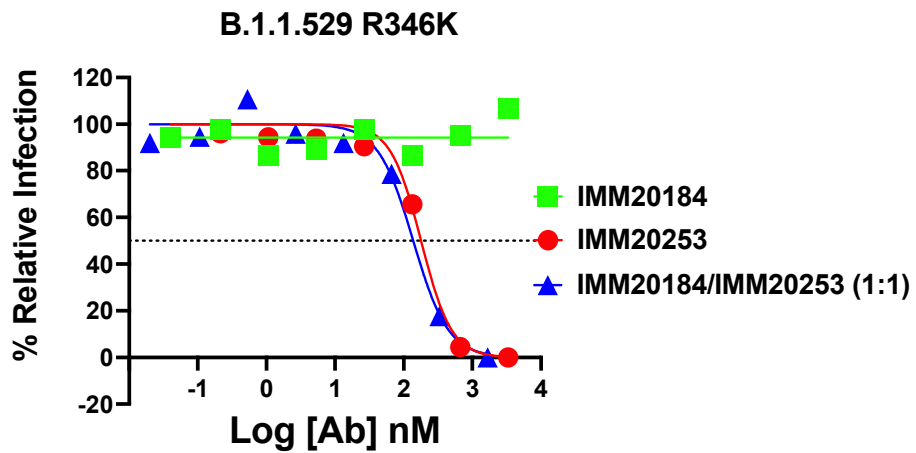



113 **Supplementary Figure 4. Focus reduction neutralization assay (FRNT) of SARS-CoV-2**  
114 **variants in the presence of IMM20184, IMM20253 and IMM20253/184 combination. (A)**  
115 **Relative infection of WA1/2020 D614G, (B) Omicron (BA.1) and (C) Omicron BA.1.1 virus**  
116 **variants in the presence of IMM20184, IMM20253 and IMM20184/253 antibodies. Data are**  
117 **representative of three independent experiments performed in duplicate.**

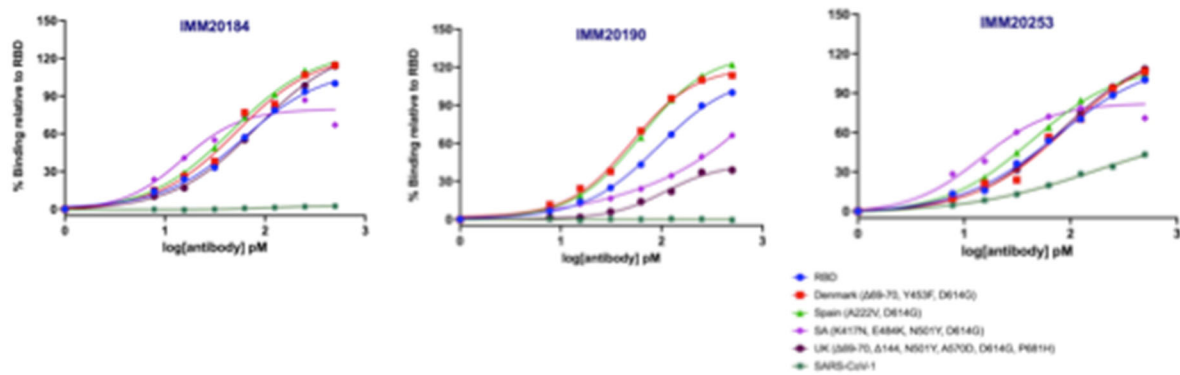

118  
119 **Supplementary Figure 5. Binding of IMM antibodies to soluble RBD proteins from SARS-**  
120 **CoV-1 and SARS-CoV-2 variants in a steady-state hTRF assay.**
